# Supplementary material for: Application of a next-generation sequencing (NGS) panel in newborn screening efficiently identifies inborn disorders of neonates
Source: Orphanet J Rare Dis. 2022 Feb 21;17:66. doi: 10.1186/s13023-022-02231-x (PMC8862216; doi:10.1186/s13023-022-02231-x)
Supplement: Supplementary file 2 — Additional file 2: Table S2. [file 13023_2022_2231_MOESM2_ESM.xlsx]

## Sheet: InputVariantsForDesign
Table S2. The list of known pathogenic variants in 134 genes
RefSeqID	Gene	Variation
NM_005957.4	MTHFR	c.1822_1823insGTACA
NM_005957.4	MTHFR	c.1753-18G>A
NM_005957.4	MTHFR	c.1699C>T
NM_005957.4	MTHFR	c.1632+2T>C
NM_005957.4	MTHFR	c.1541_1542delAG
NM_005957.4	MTHFR	c.1538_1539dupTA
NM_005957.4	MTHFR	c.1539dupA
NM_005957.4	MTHFR	c.1530G>A
NM_005957.4	MTHFR	c.1418G>T
NM_005957.4	MTHFR	c.1408G>T
NM_005957.4	MTHFR	c.1167-2delA
NM_005957.4	MTHFR	c.1130G>A
NM_005957.4	MTHFR	c.1129C>T
NM_005957.4	MTHFR	c.1115delA
NM_005957.4	MTHFR	c.1072C>T
NM_005957.4	MTHFR	c.1069C>T
NM_005957.4	MTHFR	c.1015T>G
NM_005957.4	MTHFR	c.1013T>C
NM_005957.4	MTHFR	c.891T>A
NM_005957.4	MTHFR	c.662delG
NM_005957.4	MTHFR	c.547C>T
NM_005957.4	MTHFR	c.470G>A
NM_005957.4	MTHFR	c.446_447delinsTT
NM_005957.4	MTHFR	c.440A>C
NM_005957.4	MTHFR	c.237-1G>T
NM_005957.4	MTHFR	c.202C>T
NM_005957.4	MTHFR	c.176G>C
NM_005957.4	MTHFR	c.155G>A
NM_005957.4	MTHFR	c.20delG
NM_000403.3	GALE	c.956G>A
NM_000403.3	GALE	c.905G>A
NM_000403.3	GALE	c.770A>G
NM_000403.3	GALE	c.715C>T
NM_000403.3	GALE	c.548T>C
NM_000403.3	GALE	c.505C>T
NM_000403.3	GALE	c.280G>A
NM_000403.3	GALE	c.269G>A
NM_000191.2	HMGCL	c.835G>A
NM_000191.2	HMGCL	c.505_506delTC
NM_000191.2	HMGCL	c.206_207delCT
NM_000191.2	HMGCL	c.122G>A
NM_000191.2	HMGCL	c.109G>T
NM_024009.2	GJB3	c.538C>T
NM_024009.2	GJB3	c.547G>A
NM_015506.2	MMACHC	c.80A>G
NM_015506.2	MMACHC	c.80A>G
NM_015506.2	MMACHC	c.271dupA
NM_015506.2	MMACHC	c.331C>T
NM_015506.2	MMACHC	c.347T>C
NM_015506.2	MMACHC	c.394C>T
NM_015506.2	MMACHC	c.440G>C
NM_015506.2	MMACHC	c.482G>A
NM_015506.2	MMACHC	c.609G>A
NM_015506.2	MMACHC	c.658_660delAAG
NM_000098.2	CPT2	c.338C>T
NM_000098.2	CPT2	c.359A>G
NM_000098.2	CPT2	c.370C>T
NM_000098.2	CPT2	c.452G>A
NM_000098.2	CPT2	c.520G>A
NM_000098.2	CPT2	c.680C>T
NM_000098.2	CPT2	c.1148T>A
NM_000098.2	CPT2	c.1507C>T
NM_000098.2	CPT2	c.1657G>A
NM_000098.2	CPT2	c.1883A>C
NM_000098.2	CPT2	c.1891C>T
NM_000016.4	ACADM	c.157C>T
NM_000016.4	ACADM	c.199T>C
NM_000016.4	ACADM	c.199T>C
NM_000016.4	ACADM	c.217-1G>C
NM_000016.4	ACADM	c.233T>C
NM_000016.4	ACADM	c.244dupT
NM_000016.4	ACADM	c.250C>T
NM_000016.4	ACADM	c.253G>T
NM_000016.4	ACADM	c.306_307insG
NM_000016.4	ACADM	c.320T>C
NM_000016.4	ACADM	c.347G>A
NM_000016.4	ACADM	c.362C>T
NM_000016.4	ACADM	c.387+1G>A
NM_000016.4	ACADM	c.430A>T
NM_000016.4	ACADM	c.431_434delAGTA
NM_000016.4	ACADM	c.449_452delCTGA
NM_000016.4	ACADM	c.464T>C
NM_000016.4	ACADM	c.474T>G
NM_000016.4	ACADM	c.475delT
NM_000016.4	ACADM	c.583G>A
NM_000016.4	ACADM	c.589A>G
NM_000016.4	ACADM	c.616C>T
NM_000016.4	ACADM	c.617G>A
NM_000016.4	ACADM	c.617G>T
NM_000016.4	ACADM	c.683C>A
NM_000016.4	ACADM	c.734C>T
NM_000016.4	ACADM	c.799G>A
NM_000016.4	ACADM	c.799G>C
NM_000016.4	ACADM	c.843A>T
NM_000016.4	ACADM	c.946-2A>C
NM_000016.4	ACADM	c.957_958delAT
NM_000016.4	ACADM	c.977T>C
NM_000016.4	ACADM	c.985A>G
NM_000016.4	ACADM	c.985A>G
NM_000016.4	ACADM	c.1008T>A
NM_000016.4	ACADM	c.1045C>T
NM_000016.4	ACADM	c.1150G>T
NM_000016.4	ACADM	c.1189dupT
NM_000110.3	DPYD	c.2983G>T
NM_000110.3	DPYD	c.2846A>T
NM_000110.3	DPYD	c.1905+1G>A
NM_000110.3	DPYD	c.1898delC
NM_000110.3	DPYD	c.1679T>G
NM_000110.3	DPYD	c.1156G>T
NM_000110.3	DPYD	c.1129-5923C>G
NM_000110.3	DPYD	c.703C>T
NM_000110.3	DPYD	c.557A>G
NM_000110.3	DPYD	c.295_298delTCAT
NM_000642.2	AGL	c.16C>T
NM_000642.2	AGL	c.17_18delAG
NM_000642.2	AGL	c.1222C>T
NM_000642.2	AGL	c.2039G>A
NM_000642.2	AGL	c.2590C>T
NM_000642.2	AGL	c.3682C>T
NM_000642.2	AGL	c.3965delT
NM_000642.2	AGL	c.4349-12A>G
NM_000642.2	AGL	c.4455delT
NM_001918.3	DBT	c.1448G>T
NM_001918.3	DBT	c.1355A>G
NM_001918.3	DBT	c.827T>G
NM_001918.3	DBT	c.581C>G
NM_001918.3	DBT	c.294C>G
NM_000549.3	TSHB	c.94G>T
NM_000549.3	TSHB	c.145G>A
NM_000549.3	TSHB	c.205C>T
NM_005518.3	HMGCS2	c.1162G>A
NM_005518.3	HMGCS2	c.891-2delA
NM_005518.3	HMGCS2	c.862C>T
NM_005518.3	HMGCS2	c.646delT
NM_005518.3	HMGCS2	c.520T>C
NM_005518.3	HMGCS2	c.500A>G
NM_005518.3	HMGCS2	c.160G>A
NM_001005741.2	GBA	c.1604G>A
NM_001005741.2	GBA	c.1504C>T
NM_001005741.2	GBA	c.1448T>C
NM_001005741.2	GBA	c.1342G>C
NM_001005741.2	GBA	c.1265_1319del55
NM_001005741.2	GBA	c.1297G>T
NM_001005741.2	GBA	c.1226A>G
NM_001005741.2	GBA	c.887G>A
NM_001005741.2	GBA	c.721G>A
NM_001005741.2	GBA	c.703T>C
NM_001005741.2	GBA	c.680A>G
NM_001005741.2	GBA	c.115+1G>A
NM_001005741.2	GBA	c.84dupG
NM_000254.2	MTR	c.1228G>C
NM_000254.2	MTR	c.1753C>T
NM_000254.2	MTR	c.2101delT
NM_000254.2	MTR	c.2114_2115delTC
NM_000254.2	MTR	c.2304+2C>T
NM_000254.2	MTR	c.2640_2642delAAT
NM_000254.2	MTR	c.2669_2670delTG
NM_000254.2	MTR	c.2758C>G
NM_000254.2	MTR	c.3380dupA
NM_000254.2	MTR	c.3518C>T
NM_000254.2	MTR	c.3613G>T
NM_000547.5	TPO	c.1184_1187dup
NM_000547.5	TPO	c.1339A>T
NM_000547.5	TPO	c.1357T>G
NM_000547.5	TPO	c.1618C>T
NM_000547.5	TPO	c.1768G>A
NM_000547.5	TPO	c.1943G>A
NM_000547.5	TPO	c.1994G>A
NM_000547.5	TPO	c.2077C>T
NM_000547.5	TPO	c.2395G>A
NM_000182.4	HADHA	c.2132_2133insC
NM_000182.4	HADHA	c.1793_1794delAT
NM_000182.4	HADHA	c.1678C>T
NM_000182.4	HADHA	c.1528G>C
NM_000182.4	HADHA	c.1132C>T
NM_000183.2	HADHB	c.182G>A
NM_000183.2	HADHB	c.357dupT
NM_000183.2	HADHB	c.685C>T
NM_000183.2	HADHB	c.740G>A
NM_000183.2	HADHB	c.788A>G
NM_000183.2	HADHB	c.1175C>T
NM_000183.2	HADHB	c.1331G>A
NM_000183.2	HADHB	c.1364T>G
NM_022436.2	ABCG5	c.1336C>T
NM_022436.2	ABCG5	c.1222C>T
NM_022436.2	ABCG5	c.1166G>A
NM_022436.2	ABCG5	c.978delA
NM_022436.2	ABCG5	c.335_336insA
NM_022437.2	ABCG8	c.64-2A>G
NM_022437.2	ABCG8	c.320C>G
NM_022437.2	ABCG8	c.547delC
NM_022437.2	ABCG8	c.647_657dup
NM_022437.2	ABCG8	c.965-1G>C
NM_022437.2	ABCG8	c.1083G>A
NM_022437.2	ABCG8	c.1608G>A
NM_022437.2	ABCG8	c.1720G>A
NM_003124.4	SPR	c.304G>T
NM_003124.4	SPR	c.355C>T
NM_003124.4	SPR	c.369C>G
NM_003124.4	SPR	c.448_452delAGAAC
NM_003124.4	SPR	c.448A>G
NM_003124.4	SPR	c.488C>T
NM_003124.4	SPR	c.596-2A>G
NM_003124.4	SPR	c.596del
NM_003124.4	SPR	c.599delC
NM_003124.4	SPR	c.655C>T
NM_003124.4	SPR	c.751A>T
NM_013953.3	PAX8	c.322C>T
NM_013953.3	PAX8	c.185T>G
NM_013953.3	PAX8	c.170G>A
NM_013953.3	PAX8	c.160A>G
NM_013953.3	PAX8	c.143C>T
NM_013953.3	PAX8	c.119A>C
NM_013953.3	PAX8	c.92G>A
NM_015702.2	MMADHC	c.776T>C
NM_015702.2	MMADHC	c.748C>T
NM_015702.2	MMADHC	c.746A>G
NM_015702.2	MMADHC	c.737A>G
NM_015702.2	MMADHC	c.696+3_696+6delGAGT
NM_015702.2	MMADHC	c.683C>G
NM_015702.2	MMADHC	c.545C>A
NM_015702.2	MMADHC	c.455dupC
NM_015702.2	MMADHC	c.419dupA
NM_015702.2	MMADHC	c.307_325dupCTAGCAGAACCTTTATCAA
NM_015702.2	MMADHC	c.160C>T
NM_015702.2	MMADHC	c.133_134insG
NM_015702.2	MMADHC	c.57_64delCTCTTTAG
NM_015702.2	MMADHC	c.60_61insAT
NM_003742.4	ABCB11	c.3268C>T
NM_003742.4	ABCB11	c.3169C>T
NM_003742.4	ABCB11	c.2783_2787dupGAGAT
NM_003742.4	ABCB11	c.1966_1967delTT
NM_003742.4	ABCB11	c.1723C>T
NM_003742.4	ABCB11	c.1408C>T
NM_003742.4	ABCB11	c.908+1G>A
NM_003742.4	ABCB11	c.890A>G
NM_003742.4	ABCB11	c.22C>T
NM_001875.4	CPS1	c.130C>T
NM_001875.4	CPS1	c.1010A>G
NM_001875.4	CPS1	c.1631C>T
NM_001875.4	CPS1	c.2359C>T
NM_001875.4	CPS1	c.2945G>A
NM_000463.2	UGT1A1	c.222C>A
NM_000463.2	UGT1A1	c.622_625dup
NM_000463.2	UGT1A1	c.625C>T
NM_000463.2	UGT1A1	c.722_723del
NM_000463.2	UGT1A1	c.1006C>T
NM_000463.2	UGT1A1	c.1021C>T
NM_000463.2	UGT1A1	c.1084+1G>T
NM_000060.2	BTD	c.98_104delGCGGCTGinsTCC
NM_000060.2	BTD	c.100G>A
NM_000060.2	BTD	c.235C>T
NM_000060.2	BTD	c.511G>A
NM_000060.2	BTD	c.755A>G
NM_000060.2	BTD	c.1368A>C
NM_000060.2	BTD	c.1595C>T
NM_000060.2	BTD	c.1612C>T
NM_001252634.1	THRB	c.1378G>A
NM_001252634.1	THRB	c.1376T>G
NM_001252634.1	THRB	c.1373T>C
NM_001252634.1	THRB	c.1358C>A
NM_001252634.1	THRB	c.1358dup
NM_001252634.1	THRB	c.1357C>A
NM_001252634.1	THRB	c.1357C>G
NM_001252634.1	THRB	c.1357C>T
NM_001252634.1	THRB	c.1349T>A
NM_001252634.1	THRB	c.1348C>T
NM_001252634.1	THRB	c.1336T>C
NM_001252634.1	THRB	c.1326_1327delGAinsAT
NM_001252634.1	THRB	c.1327A>G
NM_001252634.1	THRB	c.1324A>G
NM_001252634.1	THRB	c.1313G>A
NM_001252634.1	THRB	c.1312C>T
NM_001252634.1	THRB	c.1312delC
NM_001252634.1	THRB	c.1305T>G
NM_001252634.1	THRB	c.1302C>A
NM_001252634.1	THRB	c.1286G>A
NM_001252634.1	THRB	c.1148G>A
NM_001252634.1	THRB	c.1040G>A
NM_001252634.1	THRB	c.1034G>A
NM_001252634.1	THRB	c.1034G>T
NM_001252634.1	THRB	c.1033G>A
NM_001252634.1	THRB	c.1033G>C
NM_001252634.1	THRB	c.1031G>A
NM_001252634.1	THRB	c.1020G>C
NM_001252634.1	THRB	c.1010_1012delCAC
NM_001252634.1	THRB	c.1012C>T
NM_001252634.1	THRB	c.1009A>G
NM_001252634.1	THRB	c.980C>A
NM_001252634.1	THRB	c.964G>C
NM_001252634.1	THRB	c.959G>T
NM_001252634.1	THRB	c.958C>T
NM_001252634.1	THRB	c.949G>A
NM_001252634.1	THRB	c.947G>A
NM_001252634.1	THRB	c.941C>T
NM_001252634.1	THRB	c.938T>C
NM_001252634.1	THRB	c.929T>C
NM_001252634.1	THRB	c.928A>G
NM_001252634.1	THRB	c.803C>G
NM_001252634.1	THRB	c.728G>A
NM_001252634.1	THRB	c.727C>T
NM_001252634.1	THRB	c.700G>A
NM_001252634.1	THRB	c.67C>T
NM_000387.5	SLC25A20	c.897dupC
NM_000387.5	SLC25A20	c.713A>G
NM_000387.5	SLC25A20	c.576G>A
NM_000387.5	SLC25A20	c.532C>T
NM_000387.5	SLC25A20	c.505dup
NM_000387.5	SLC25A20	c.496C>T
NM_000387.5	SLC25A20	c.292A>T
NM_000387.5	SLC25A20	c.199-2A>C
NM_000387.5	SLC25A20	c.199-10T>G
NM_000387.5	SLC25A20	c.106-2A>T
NM_000387.5	SLC25A20	c.84delT
NM_000387.5	SLC25A20	c.10C>T
NM_000532.4	PCCB	c.502G>A
NM_000532.4	PCCB	c.737G>T
NM_000532.4	PCCB	c.1173_1174insT
NM_000532.4	PCCB	c.1228C>T
NM_000532.4	PCCB	c.1283C>T
NM_000532.4	PCCB	c.1304A>G
NM_000532.4	PCCB	c.1495C>T
NM_000532.4	PCCB	c.1534C>T
NM_000532.4	PCCB	c.1540_1541insCCC
NM_020166.3	MCCC1	c.2079delA
NM_020166.3	MCCC1	c.1594G>C
NM_020166.3	MCCC1	c.1380T>G
NM_020166.3	MCCC1	c.1310T>C
NM_000203.3	IDUA	c.192C>A
NM_000203.3	IDUA	c.208C>T
NM_000203.3	IDUA	c.266G>A
NM_000203.3	IDUA	c.1037T>G
NM_000203.3	IDUA	c.1206G>A
NM_000203.3	IDUA	c.1855C>G
NM_000203.3	IDUA	c.1861C>T
NM_000203.3	IDUA	c.1960T>G
NM_000320.2	QDPR	c.449A>G
NM_000320.2	QDPR	c.344C>T
NM_000320.2	QDPR	c.322T>G
NM_000320.2	QDPR	c.270G>A
NM_000320.2	QDPR	c.106T>C
NM_000320.2	QDPR	c.68G>A
NM_000320.2	QDPR	c.48C>G
NM_000320.2	QDPR	c.1A>T
NM_005327.4	HADH	c.118G>A
NM_005327.4	HADH	c.171C>A
NM_005327.4	HADH	c.374_375insTTCA
NM_005327.4	HADH	c.636+471G>T
NM_005327.4	HADH	c.706C>T
NM_005327.4	HADH	c.773C>T
NM_172250.2	MMAA	c.64C>T
NM_172250.2	MMAA	c.161G>A
NM_172250.2	MMAA	c.260_267dupATAAACTT
NM_172250.2	MMAA	c.266T>C
NM_172250.2	MMAA	c.283C>T
NM_172250.2	MMAA	c.283C>T
NM_172250.2	MMAA	c.358C>T
NM_172250.2	MMAA	c.387C>A
NM_172250.2	MMAA	c.397C>T
NM_172250.2	MMAA	c.433C>T
NM_172250.2	MMAA	c.433C>T
NM_172250.2	MMAA	c.450_451insG
NM_172250.2	MMAA	c.503delC
NM_172250.2	MMAA	c.503delC
NM_172250.2	MMAA	c.562G>C
NM_172250.2	MMAA	c.563-1G>A
NM_172250.2	MMAA	c.593_596delCTGA
NM_172250.2	MMAA	c.594dupT
NM_172250.2	MMAA	c.620A>G
NM_172250.2	MMAA	c.620A>G
NM_172250.2	MMAA	c.650T>A
NM_172250.2	MMAA	c.653G>A
NM_172250.2	MMAA	c.733+1G>A
NM_172250.2	MMAA	c.742C>T
NM_172250.2	MMAA	c.812_813dupAG
NM_172250.2	MMAA	c.959G>A
NM_172250.2	MMAA	c.988C>T
NM_172250.2	MMAA	c.1076G>A
NM_172250.2	MMAA	c.1089_1090delGA
NM_004453.2	ETFDH	c.2T>C
NM_004453.2	ETFDH	c.250G>A
NM_004453.2	ETFDH	c.380T>A
NM_004453.2	ETFDH	c.524G>A
NM_004453.2	ETFDH	c.524G>T
NM_004453.2	ETFDH	c.1130T>C
NM_004453.2	ETFDH	c.1448C>T
NM_002454.2	MTRR	c.985-2A>G
NM_002454.2	MTRR	c.1361C>T
NM_002454.2	MTRR	c.1379T>G
NM_002454.2	MTRR	c.1459G>A
NM_002454.2	MTRR	c.1573C>T
NM_002454.2	MTRR	c.1759_1762delGAGA
NM_002185.4	IL7R	c.221+2T>G
NM_002185.4	IL7R	c.291_294del
NM_002185.4	IL7R	c.333T>A
NM_002185.4	IL7R	c.353G>A
NM_002185.4	IL7R	c.361dup
NM_002185.4	IL7R	c.394C>T
NM_002185.4	IL7R	c.437_438del
NM_002185.4	IL7R	c.538-1G>A
NM_002185.4	IL7R	c.651G>A
NM_002185.4	IL7R	c.704C>G
NM_002185.4	IL7R	c.753dup
NM_022132.4	MCCC2	c.295G>C
NM_022132.4	MCCC2	c.464G>A
NM_022132.4	MCCC2	c.517_518insT
NM_022132.4	MCCC2	c.803G>C
NM_022132.4	MCCC2	c.838G>T
NM_022132.4	MCCC2	c.929C>G
NM_022132.4	MCCC2	c.1015G>A
NM_003060.3	SLC22A5	c.12C>G
NM_003060.3	SLC22A5	c.42G>A
NM_003060.3	SLC22A5	c.67_69delTTC
NM_003060.3	SLC22A5	c.77G>A
NM_003060.3	SLC22A5	c.95A>G
NM_003060.3	SLC22A5	c.254_264dupGGCTCGCCACC
NM_003060.3	SLC22A5	c.361C>T
NM_003060.3	SLC22A5	c.394-2A>C
NM_003060.3	SLC22A5	c.395G>A
NM_003060.3	SLC22A5	c.652+1G>A
NM_003060.3	SLC22A5	c.653_654insTATGGCCATCAGGTTGGAG
NM_003060.3	SLC22A5	c.695C>T
NM_003060.3	SLC22A5	c.755delT
NM_003060.3	SLC22A5	c.760C>T
NM_003060.3	SLC22A5	c.839delC
NM_003060.3	SLC22A5	c.844C>T
NM_003060.3	SLC22A5	c.845G>A
NM_003060.3	SLC22A5	c.865C>T
NM_003060.3	SLC22A5	c.881delA
NM_003060.3	SLC22A5	c.1051T>C
NM_003060.3	SLC22A5	c.1053-3_1053-2delCAinsTC
NM_003060.3	SLC22A5	c.1053-2A>C
NM_003060.3	SLC22A5	c.1172G>A
NM_003060.3	SLC22A5	c.1188T>G
NM_003060.3	SLC22A5	c.1196G>A
NM_003060.3	SLC22A5	c.1252C>T
NM_003060.3	SLC22A5	c.1304delG
NM_003060.3	SLC22A5	c.1365dupC
NM_003060.3	SLC22A5	c.1400C>G
NM_003060.3	SLC22A5	c.1411C>T
NM_003060.3	SLC22A5	c.1412G>A
NM_003060.3	SLC22A5	c.1433C>T
NM_003060.3	SLC22A5	c.1595_1604dupACAGAAAAAC
NM_000367.4	TPMT	c.719A>G
NM_000367.4	TPMT	c.626-1G>A
NM_000367.4	TPMT	c.460G>A
NM_000367.4	TPMT	c.238G>C
NM_000255.3	MMUT	c.2194_2197delGCCGinsTGGAA
NM_000255.3	MMUT	c.2179C>T
NM_000255.3	MMUT	c.2159_2160delAT
NM_000255.3	MMUT	c.2150G>T
NM_000255.3	MMUT	c.2150G>T
NM_000255.3	MMUT	c.2124+1G>A
NM_000255.3	MMUT	c.2098_2099delAT
NM_000255.3	MMUT	c.2099T>A
NM_000255.3	MMUT	c.2080C>T
NM_000255.3	MMUT	c.2080C>T
NM_000255.3	MMUT	c.2062G>T
NM_000255.3	MMUT	c.2009delG
NM_000255.3	MMUT	c.1957-2A>G
NM_000255.3	MMUT	c.1956+1G>A
NM_000255.3	MMUT	c.1946delC
NM_000255.3	MMUT	c.1891delG
NM_000255.3	MMUT	c.1885dupA
NM_000255.3	MMUT	c.1880A>G
NM_000255.3	MMUT	c.1867G>A
NM_000255.3	MMUT	c.1867G>A
NM_000255.3	MMUT	c.1867G>C
NM_000255.3	MMUT	c.1846C>T
NM_000255.3	MMUT	c.1844C>G
NM_000255.3	MMUT	c.1782_1786delTAAAG
NM_000255.3	MMUT	c.1765C>T
NM_000255.3	MMUT	c.1741C>T
NM_000255.3	MMUT	c.1718T>C
NM_000255.3	MMUT	c.1677-1G>A
NM_000255.3	MMUT	c.1677-1G>C
NM_000255.3	MMUT	c.1677-2A>C
NM_000255.3	MMUT	c.1658delT
NM_000255.3	MMUT	c.1630_1631delGGinsTA
NM_000255.3	MMUT	c.1560+1G>A
NM_000255.3	MMUT	c.1560+1G>T
NM_000255.3	MMUT	c.1541delA
NM_000255.3	MMUT	c.1531C>T
NM_000255.3	MMUT	c.1481T>A
NM_000255.3	MMUT	c.1420C>T
NM_000255.3	MMUT	c.1399C>T
NM_000255.3	MMUT	c.1351G>T
NM_000255.3	MMUT	c.1332+1delG
NM_000255.3	MMUT	c.1328_1329insT
NM_000255.3	MMUT	c.1301_1302delTC
NM_000255.3	MMUT	c.1287C>G
NM_000255.3	MMUT	c.1280G>A
NM_000255.3	MMUT	c.1276G>T
NM_000255.3	MMUT	c.1237C>T
NM_000255.3	MMUT	c.1207C>T
NM_000255.3	MMUT	c.1196_1197delTG
NM_000255.3	MMUT	c.1106G>A
NM_000255.3	MMUT	c.1105C>T
NM_000255.3	MMUT	c.1105C>T
NM_000255.3	MMUT	c.1097A>G
NM_000255.3	MMUT	c.1083+2T>A
NM_000255.3	MMUT	c.1062delTinsCATCCAGA
NM_000255.3	MMUT	c.1029delA
NM_000255.3	MMUT	c.1025C>A
NM_000255.3	MMUT	c.1022_1023insA
NM_000255.3	MMUT	c.982C>T
NM_000255.3	MMUT	c.972delT
NM_000255.3	MMUT	c.970G>A
NM_000255.3	MMUT	c.850G>T
NM_000255.3	MMUT	c.754-1G>A
NM_000255.3	MMUT	c.753+2T>A
NM_000255.3	MMUT	c.753+1G>A
NM_000255.3	MMUT	c.729_730insTT
NM_000255.3	MMUT	c.694dupA
NM_000255.3	MMUT	c.691T>A
NM_000255.3	MMUT	c.689_690delCA
NM_000255.3	MMUT	c.682C>T
NM_000255.3	MMUT	c.682C>T
NM_000255.3	MMUT	c.671_678dupAATTTATG
NM_000255.3	MMUT	c.670G>T
NM_000255.3	MMUT	c.656delA
NM_000255.3	MMUT	c.655A>T
NM_000255.3	MMUT	c.655A>T
NM_000255.3	MMUT	c.643G>A
NM_000255.3	MMUT	c.643G>A
NM_000255.3	MMUT	c.623_624delTA
NM_000255.3	MMUT	c.607G>A
NM_000255.3	MMUT	c.607G>C
NM_000255.3	MMUT	c.572C>A
NM_000255.3	MMUT	c.544_545insA
NM_000255.3	MMUT	c.521T>C
NM_000255.3	MMUT	c.481G>T
NM_000255.3	MMUT	c.459delT
NM_000255.3	MMUT	c.454C>T
NM_000255.3	MMUT	c.404C>A
NM_000255.3	MMUT	c.360dupT
NM_000255.3	MMUT	c.349G>T
NM_000255.3	MMUT	c.323G>A
NM_000255.3	MMUT	c.322C>G
NM_000255.3	MMUT	c.322C>T
NM_000255.3	MMUT	c.322C>T
NM_000255.3	MMUT	c.313T>C
NM_000255.3	MMUT	c.313T>C
NM_000255.3	MMUT	c.281G>T
NM_000255.3	MMUT	c.280G>A
NM_000255.3	MMUT	c.278G>A
NM_000255.3	MMUT	c.278G>A
NM_000255.3	MMUT	c.257C>T
NM_000255.3	MMUT	c.160A>T
NM_000255.3	MMUT	c.146_147insA
NM_000255.3	MMUT	c.141_142insTTTT
NM_000255.3	MMUT	c.91C>T
NM_000255.3	MMUT	c.19C>T
NM_000255.3	MMUT	c.1A>G
NM_018368.3	LMBRD1	c.1338+2T>C
NM_018368.3	LMBRD1	c.1056delG
NM_018368.3	LMBRD1	c.744delT
NM_018368.3	LMBRD1	c.515_516delAC
NM_018368.3	LMBRD1	c.404delC
NM_018368.3	LMBRD1	c.63dupA
NM_183050.2	BCKDHB	c.163_166dupACTT
NM_183050.2	BCKDHB	c.272C>T
NM_183050.2	BCKDHB	c.326delG
NM_183050.2	BCKDHB	c.331C>T
NM_183050.2	BCKDHB	c.348delA
NM_183050.2	BCKDHB	c.356T>G
NM_183050.2	BCKDHB	c.356T>G
NM_183050.2	BCKDHB	c.403G>A
NM_183050.2	BCKDHB	c.410C>T
NM_183050.2	BCKDHB	c.487G>T
NM_183050.2	BCKDHB	c.548G>C
NM_183050.2	BCKDHB	c.548G>C
NM_183050.2	BCKDHB	c.564T>A
NM_183050.2	BCKDHB	c.595_596delAG
NM_183050.2	BCKDHB	c.616C>T
NM_183050.2	BCKDHB	c.616C>T
NM_183050.2	BCKDHB	c.633+1G>T
NM_183050.2	BCKDHB	c.641T>A
NM_183050.2	BCKDHB	c.662_663delCC
NM_183050.2	BCKDHB	c.665A>G
NM_183050.2	BCKDHB	c.688G>T
NM_183050.2	BCKDHB	c.721A>T
NM_183050.2	BCKDHB	c.752T>C
NM_183050.2	BCKDHB	c.799C>T
NM_183050.2	BCKDHB	c.832G>A
NM_183050.2	BCKDHB	c.832G>A
NM_183050.2	BCKDHB	c.853C>T
NM_183050.2	BCKDHB	c.937delG
NM_183050.2	BCKDHB	c.954delT
NM_183050.2	BCKDHB	c.970C>T
NM_183050.2	BCKDHB	c.1039-7_1039-4delTCTG
NM_183050.2	BCKDHB	c.1039-7_1039-4delTCTG
NM_183050.2	BCKDHB	c.1114G>T
NM_183050.2	BCKDHB	c.1114G>T
NM_183050.2	BCKDHB	c.1149T>A
NM_000045.3	ARG1	c.32T>C
NM_000045.3	ARG1	c.61C>T
NM_000045.3	ARG1	c.365G>A
NM_000045.3	ARG1	c.413G>T
NM_000045.3	ARG1	c.703G>C
NM_000045.3	ARG1	c.869C>G
NM_000045.3	ARG1	c.871C>T
NM_000823.3	GHRHR	c.57+1G>T
NM_000823.3	GHRHR	c.214G>T
NM_000823.3	GHRHR	c.431T>A
NM_000823.3	GHRHR	c.665C>A
NM_000823.3	GHRHR	c.725T>G
NM_000823.3	GHRHR	c.985A>G
NM_000823.3	GHRHR	c.1089_1093delACTGG
NM_000048.3	ASL	c.35G>A
NM_000048.3	ASL	c.283C>T
NM_000048.3	ASL	c.346C>T
NM_000048.3	ASL	c.532G>A
NM_000048.3	ASL	c.857A>G
NM_000048.3	ASL	c.1060C>T
NM_000048.3	ASL	c.1135C>T
NM_000048.3	ASL	c.1153C>T
NM_014251.2	SLC25A13	c.1813C>T
NM_014251.2	SLC25A13	c.1801G>A
NM_014251.2	SLC25A13	c.1801G>T
NM_014251.2	SLC25A13	c.1799dupA
NM_014251.2	SLC25A13	c.1592G>A
NM_014251.2	SLC25A13	c.1311+1G>A
NM_014251.2	SLC25A13	c.1177+1G>A
NM_014251.2	SLC25A13	c.1078C>T
NM_014251.2	SLC25A13	c.852_855delTATG
NM_014251.2	SLC25A13	c.674C>A
NM_014251.2	SLC25A13	c.615+5G>A
NM_014251.2	SLC25A13	c.615+1G>C
NM_000441.1	SLC26A4	c.-3-2A>G
NM_000441.1	SLC26A4	c.68C>A
NM_000441.1	SLC26A4	c.84C>A
NM_000441.1	SLC26A4	c.85G>C
NM_000441.1	SLC26A4	c.87G>C
NM_000441.1	SLC26A4	c.129dupC
NM_000441.1	SLC26A4	c.149T>G
NM_000441.1	SLC26A4	c.165-1G>A
NM_000441.1	SLC26A4	c.170C>A
NM_000441.1	SLC26A4	c.230A>T
NM_000441.1	SLC26A4	c.233A>G
NM_000441.1	SLC26A4	c.235C>T
NM_000441.1	SLC26A4	c.249G>A
NM_000441.1	SLC26A4	c.269C>T
NM_000441.1	SLC26A4	c.279delT
NM_000441.1	SLC26A4	c.279T>A
NM_000441.1	SLC26A4	c.281C>T
NM_000441.1	SLC26A4	c.304G>A
NM_000441.1	SLC26A4	c.322delC
NM_000441.1	SLC26A4	c.365_366insT
NM_000441.1	SLC26A4	c.395C>T
NM_000441.1	SLC26A4	c.397T>A
NM_000441.1	SLC26A4	c.407_411delTCTCA
NM_000441.1	SLC26A4	c.412G>T
NM_000441.1	SLC26A4	c.415+7A>G
NM_000441.1	SLC26A4	c.440T>C
NM_000441.1	SLC26A4	c.589G>A
NM_000441.1	SLC26A4	c.601-1G>A
NM_000441.1	SLC26A4	c.626G>T
NM_000441.1	SLC26A4	c.665G>T
NM_000441.1	SLC26A4	c.707T>C
NM_000441.1	SLC26A4	c.716T>A
NM_000441.1	SLC26A4	c.753_756delCTCT
NM_000441.1	SLC26A4	c.754T>C
NM_000441.1	SLC26A4	c.783_784insT
NM_000441.1	SLC26A4	c.890delC
NM_000441.1	SLC26A4	c.916dupG
NM_000441.1	SLC26A4	c.918+1G>A
NM_000441.1	SLC26A4	c.919-2A>G
NM_000441.1	SLC26A4	c.941C>A
NM_000441.1	SLC26A4	c.946G>T
NM_000441.1	SLC26A4	c.1001+1G>A
NM_000441.1	SLC26A4	c.1079C>T
NM_000441.1	SLC26A4	c.1105A>G
NM_000441.1	SLC26A4	c.1147delC
NM_000441.1	SLC26A4	c.1149+3A>G
NM_000441.1	SLC26A4	c.1151A>G
NM_000441.1	SLC26A4	c.1160C>T
NM_000441.1	SLC26A4	c.1172G>A
NM_000441.1	SLC26A4	c.1174A>T
NM_000441.1	SLC26A4	c.1198delT
NM_000441.1	SLC26A4	c.1226G>A
NM_000441.1	SLC26A4	c.1229C>T
NM_000441.1	SLC26A4	c.1246A>C
NM_000441.1	SLC26A4	c.1264-1G>C
NM_000441.1	SLC26A4	c.1334_1335insAGTC
NM_000441.1	SLC26A4	c.1334T>G
NM_000441.1	SLC26A4	c.1337A>G
NM_000441.1	SLC26A4	c.1341+1delG
NM_000441.1	SLC26A4	c.1343C>T
NM_000441.1	SLC26A4	c.1363A>T
NM_000441.1	SLC26A4	c.1371C>A
NM_000441.1	SLC26A4	c.1392delG
NM_000441.1	SLC26A4	c.1439T>A
NM_000441.1	SLC26A4	c.1536_1537delAG
NM_000441.1	SLC26A4	c.1541A>G
NM_000441.1	SLC26A4	c.1588T>C
NM_000441.1	SLC26A4	c.1589A>C
NM_000441.1	SLC26A4	c.1595G>T
NM_000441.1	SLC26A4	c.1614+1G>A
NM_000441.1	SLC26A4	c.1615-1G>A
NM_000441.1	SLC26A4	c.1667A>G
NM_000441.1	SLC26A4	c.1694G>A
NM_000441.1	SLC26A4	c.1707+5G>A
NM_000441.1	SLC26A4	c.1803G>A
NM_000441.1	SLC26A4	c.1863delT
NM_000441.1	SLC26A4	c.1919G>A
NM_000441.1	SLC26A4	c.1975G>C
NM_000441.1	SLC26A4	c.1985G>A
NM_000441.1	SLC26A4	c.2015G>A
NM_000441.1	SLC26A4	c.2027T>A
NM_000441.1	SLC26A4	c.2080T>C
NM_000441.1	SLC26A4	c.2086C>T
NM_000441.1	SLC26A4	c.2089+1G>A
NM_000441.1	SLC26A4	c.2127delT
NM_000441.1	SLC26A4	c.2162C>T
NM_000441.1	SLC26A4	c.2168A>G
NM_000441.1	SLC26A4	c.2170G>A
NM_000441.1	SLC26A4	c.2173G>C
NM_000441.1	SLC26A4	c.2186T>C
NM_000441.1	SLC26A4	c.2219G>T
NM_000441.1	SLC26A4	c.2228T>A
NM_000441.1	SLC26A4	c.2343A>G
NM_000108.4	DLD	c.104dupA
NM_000108.4	DLD	c.198+2T>A
NM_000108.4	DLD	c.214A>G
NM_000108.4	DLD	c.865dupA
NM_000108.4	DLD	c.943C>T
NM_000108.4	DLD	c.1436A>T
NM_000108.4	DLD	c.1444A>G
NM_000108.4	DLD	c.1463C>T
NM_003235.4	TG	c.266dup
NM_003235.4	TG	c.886C>T
NM_003235.4	TG	c.2443G>T
NM_003235.4	TG	c.3229T>C
NM_003235.4	TG	c.3733T>C
NM_003235.4	TG	c.4588C>T
NM_003235.4	TG	c.5184C>A
NM_003235.4	TG	c.5690G>A
NM_003235.4	TG	c.5986T>A
NM_003235.4	TG	c.6379C>T
NM_003235.4	TG	c.6725G>A
NM_003235.4	TG	c.7007G>A
NM_003235.4	TG	c.7021G>A
NM_003235.4	TG	c.7123G>A
NM_000170.2	GLDC	c.2665+1G>C
NM_000170.2	GLDC	c.2614A>T
NM_000170.2	GLDC	c.2405C>T
NM_000170.2	GLDC	c.2316-1G>A
NM_000170.2	GLDC	c.1580+2T>G
NM_000170.2	GLDC	c.1545G>C
NM_000170.2	GLDC	c.1166C>T
NM_000170.2	GLDC	c.1009C>T
NM_000170.2	GLDC	c.499G>T
NM_000155.3	GALT	c.18delC
NM_000155.3	GALT	c.25C>T
NM_000155.3	GALT	c.82+2T>A
NM_000155.3	GALT	c.122G>A
NM_000155.3	GALT	c.130G>A
NM_000155.3	GALT	c.160C>T
NM_000155.3	GALT	c.199C>T
NM_000155.3	GALT	c.200G>A
NM_000155.3	GALT	c.221T>C
NM_000155.3	GALT	c.238C>T
NM_000155.3	GALT	c.253-2A>G
NM_000155.3	GALT	c.290A>G
NM_000155.3	GALT	c.329-2A>C
NM_000155.3	GALT	c.337G>A
NM_000155.3	GALT	c.341A>C
NM_000155.3	GALT	c.377+1G>A
NM_000155.3	GALT	c.379A>G
NM_000155.3	GALT	c.382G>A
NM_000155.3	GALT	c.404C>G
NM_000155.3	GALT	c.404C>T
NM_000155.3	GALT	c.413C>T
NM_000155.3	GALT	c.424A>G
NM_000155.3	GALT	c.425T>A
NM_000155.3	GALT	c.428C>T
NM_000155.3	GALT	c.443G>A
NM_000155.3	GALT	c.452T>C
NM_000155.3	GALT	c.462G>A
NM_000155.3	GALT	c.490delC
NM_000155.3	GALT	c.505C>A
NM_000155.3	GALT	c.507+2T>C
NM_000155.3	GALT	c.512T>C
NM_000155.3	GALT	c.524G>A
NM_000155.3	GALT	c.536G>A
NM_000155.3	GALT	c.547C>A
NM_000155.3	GALT	c.563A>G
NM_000155.3	GALT	c.564+1G>A
NM_000155.3	GALT	c.580T>C
NM_000155.3	GALT	c.584T>C
NM_000155.3	GALT	c.595G>A
NM_000155.3	GALT	c.602G>A
NM_000155.3	GALT	c.607G>A
NM_000155.3	GALT	c.610C>T
NM_000155.3	GALT	c.611G>C
NM_000155.3	GALT	c.616C>T
NM_000155.3	GALT	c.619C>T
NM_000155.3	GALT	c.626A>C
NM_000155.3	GALT	c.626A>G
NM_000155.3	GALT	c.634C>T
NM_000155.3	GALT	c.667C>A
NM_000155.3	GALT	c.677T>C
NM_000155.3	GALT	c.687G>T
NM_000155.3	GALT	c.691C>T
NM_000155.3	GALT	c.692G>A
NM_000155.3	GALT	c.747G>A
NM_000155.3	GALT	c.775C>T
NM_000155.3	GALT	c.776G>A
NM_000155.3	GALT	c.815G>A
NM_000155.3	GALT	c.821-2A>G
NM_000155.3	GALT	c.824delT
NM_000155.3	GALT	c.844C>G
NM_000155.3	GALT	c.855G>C
NM_000155.3	GALT	c.855G>T
NM_000155.3	GALT	c.881T>A
NM_000155.3	GALT	c.899G>A
NM_000155.3	GALT	c.920C>A
NM_000155.3	GALT	c.938G>A
NM_000155.3	GALT	c.947G>A
NM_000155.3	GALT	c.948G>A
NM_000155.3	GALT	c.949delC
NM_000155.3	GALT	c.957C>A
NM_000155.3	GALT	c.957C>G
NM_000155.3	GALT	c.958G>A
NM_000155.3	GALT	c.967T>C
NM_000155.3	GALT	c.974C>T
NM_000155.3	GALT	c.980T>C
NM_000155.3	GALT	c.989C>T
NM_000155.3	GALT	c.997C>G
NM_000155.3	GALT	c.997C>T
NM_000155.3	GALT	c.998G>A
NM_000155.3	GALT	c.1001A>G
NM_000155.3	GALT	c.1014C>G
NM_000155.3	GALT	c.1030C>A
NM_000155.3	GALT	c.1030C>T
NM_000155.3	GALT	c.1034C>A
NM_000155.3	GALT	c.1048A>G
NM_000155.3	GALT	c.1075A>T
NM_000155.3	GALT	c.1098C>A
NM_000155.3	GALT	c.1138T>C
NM_000155.3	GALT	c.1140A>C
NR_003051.3	RMRP	n.263G>T
NR_003051.3	RMRP	n.219A>G
NR_003051.3	RMRP	n.215A>C
NR_003051.3	RMRP	n.147G>A
NR_003051.3	RMRP	n.91_92delAGinsGC
NR_003051.3	RMRP	n.71A>G
NR_003051.3	RMRP	n.5C>T
NR_003051.3	RMRP	n.-14_3dup17
NR_003051.3	RMRP	n.-19_-3dup17
NR_003051.3	RMRP	n.-6_-5insCCTGAG
NM_001698.2	AUH	c.991A>T
NM_001698.2	AUH	c.895-1G>A
NM_001698.2	AUH	c.650G>A
NM_001698.2	AUH	c.589C>T
NM_001698.2	AUH	c.559G>A
NM_000035.3	ALDOB	c.1044_1049delTTCTGGinsACACT
NM_000035.3	ALDOB	c.1013C>T
NM_000035.3	ALDOB	c.1000-1_1006delGGCTAACTinsTG
NM_000035.3	ALDOB	c.1005C>G
NM_000035.3	ALDOB	c.1005C>G
NM_000035.3	ALDOB	c.865_867delCTT
NM_000035.3	ALDOB	c.865delC
NM_000035.3	ALDOB	c.841_842delAC
NM_000035.3	ALDOB	c.799+2T>A
NM_000035.3	ALDOB	c.770T>C
NM_000035.3	ALDOB	c.720C>A
NM_000035.3	ALDOB	c.720C>A
NM_000035.3	ALDOB	c.683_688dupTGCTAA
NM_000035.3	ALDOB	c.625-1G>A
NM_000035.3	ALDOB	c.625-2A>G
NM_000035.3	ALDOB	c.612T>A
NM_000035.3	ALDOB	c.612T>G
NM_000035.3	ALDOB	c.540+1G>C
NM_000035.3	ALDOB	c.524C>A
NM_000035.3	ALDOB	c.524C>A
NM_000035.3	ALDOB	c.522C>G
NM_000035.3	ALDOB	c.448G>C
NM_000035.3	ALDOB	c.448G>C
NM_000035.3	ALDOB	c.444G>A
NM_000035.3	ALDOB	c.360_363delCAAA
NM_000035.3	ALDOB	c.360_363delCAAA
NM_000035.3	ALDOB	c.331C>T
NM_000035.3	ALDOB	c.325-1G>A
NM_000035.3	ALDOB	c.325-1G>C
NM_000035.3	ALDOB	c.250delC
NM_000035.3	ALDOB	c.178C>T
NM_000035.3	ALDOB	c.178C>T
NM_000035.3	ALDOB	c.146delT
NM_000035.3	ALDOB	c.62delA
NM_000035.3	ALDOB	c.10C>T
NM_000035.3	ALDOB	c.10C>T
NM_000035.3	ALDOB	c.2T>C
NM_000050.4	ASS1	c.40G>A
NM_000050.4	ASS1	c.257G>A
NM_000050.4	ASS1	c.421-2A>G
NM_000050.4	ASS1	c.470G>A
NM_000050.4	ASS1	c.539G>A
NM_000050.4	ASS1	c.794G>A
NM_000050.4	ASS1	c.835C>T
NM_000050.4	ASS1	c.910C>T
NM_000050.4	ASS1	c.970G>A
NM_000050.4	ASS1	c.970+5G>A
NM_000050.4	ASS1	c.1085G>T
NM_000050.4	ASS1	c.1087C>T
NM_000050.4	ASS1	c.1168G>A
NM_000281.3	PCBD1	c.313T>C
NM_000281.3	PCBD1	c.292C>T
NM_000281.3	PCBD1	c.263G>A
NM_000281.3	PCBD1	c.259G>T
NM_000281.3	PCBD1	c.244T>C
NM_000281.3	PCBD1	c.236C>T
NM_000281.3	PCBD1	c.79G>T
NM_000429.2	MAT1A	c.1070C>T
NM_000429.2	MAT1A	c.1043_1044delTG
NM_000429.2	MAT1A	c.1006G>A
NM_000429.2	MAT1A	c.966T>G
NM_000429.2	MAT1A	c.914T>C
NM_000429.2	MAT1A	c.827_828insG
NM_000429.2	MAT1A	c.791G>A
NM_000429.2	MAT1A	c.790C>T
NM_000429.2	MAT1A	c.538_539insTG
NM_000429.2	MAT1A	c.164C>A
NM_000274.3	OAT	c.1276C>T
NM_000274.3	OAT	c.1250C>T
NM_000274.3	OAT	c.1205T>C
NM_000274.3	OAT	c.1201G>T
NM_000274.3	OAT	c.1192C>T
NM_000274.3	OAT	c.1186C>T
NM_000274.3	OAT	c.1180T>C
NM_000274.3	OAT	c.1124G>C
NM_000274.3	OAT	c.1058G>A
NM_000274.3	OAT	c.955C>T
NM_000274.3	OAT	c.897C>G
NM_000274.3	OAT	c.824G>A
NM_000274.3	OAT	c.812G>A
NM_000274.3	OAT	c.808G>C
NM_000274.3	OAT	c.749G>C
NM_000274.3	OAT	c.734A>G
NM_000274.3	OAT	c.677C>T
NM_000274.3	OAT	c.627T>A
NM_000274.3	OAT	c.596C>A
NM_000274.3	OAT	c.550_552delGCT
NM_000274.3	OAT	c.550G>A
NM_000274.3	OAT	c.539G>C
NM_000274.3	OAT	c.533G>A
NM_000274.3	OAT	c.461G>T
NM_000274.3	OAT	c.278G>T
NM_000274.3	OAT	c.268C>G
NM_000274.3	OAT	c.163T>C
NM_000274.3	OAT	c.162C>A
NM_000274.3	OAT	c.159delC
NM_000274.3	OAT	c.49_52dup
NM_000274.3	OAT	c.3G>A
NM_000518.4	HBB	c.*110T>C
NM_000518.4	HBB	c.425_433delTGGCCCACA
NM_000518.4	HBB	c.380T>A
NM_000518.4	HBB	c.380T>G
NM_000518.4	HBB	c.364G>C
NM_000518.4	HBB	c.341T>A
NM_000518.4	HBB	c.332T>C
NM_000518.4	HBB	c.322_323insC
NM_000518.4	HBB	c.316-1G>T
NM_000518.4	HBB	c.316-2A>C
NM_000518.4	HBB	c.316-2A>G
NM_000518.4	HBB	c.316-3C>A
NM_000518.4	HBB	c.316-7C>G
NM_000518.4	HBB	c.316-14T>G
NM_000518.4	HBB	c.316-106C>G
NM_000518.4	HBB	c.316-146T>G
NM_000518.4	HBB	c.316-197C>T
NM_000518.4	HBB	c.315+2delT
NM_000518.4	HBB	c.315+1G>A
NM_000518.4	HBB	c.315+1G>C
NM_000518.4	HBB	c.315+1G>T
NM_000518.4	HBB	c.287_288insA
NM_000518.4	HBB	c.235delC
NM_000518.4	HBB	c.230delC
NM_000518.4	HBB	c.226delC
NM_000518.4	HBB	c.216_217insT
NM_000518.4	HBB	c.217dupA
NM_000518.4	HBB	c.215_216insA
NM_000518.4	HBB	c.212C>G
NM_000518.4	HBB	c.203_204delTG
NM_000518.4	HBB	c.189_195delTCATGGC
NM_000518.4	HBB	c.184A>T
NM_000518.4	HBB	c.178A>T
NM_000518.4	HBB	c.176_177insC
NM_000518.4	HBB	c.170G>A
NM_000518.4	HBB	c.165delT
NM_000518.4	HBB	c.143_146dupATCT
NM_000518.4	HBB	c.138delT
NM_000518.4	HBB	c.135delC
NM_000518.4	HBB	c.126_129delCTTT
NM_000518.4	HBB	c.114_120delGACCCAG
NM_000518.4	HBB	c.111_118delTTGGACCC
NM_000518.4	HBB	c.118C>T
NM_000518.4	HBB	c.114G>A
NM_000518.4	HBB	c.113G>A
NM_000518.4	HBB	c.112delT
NM_000518.4	HBB	c.110delC
NM_000518.4	HBB	c.108C>A
NM_000518.4	HBB	c.94delC
NM_000518.4	HBB	c.93-1G>A
NM_000518.4	HBB	c.93-1G>C
NM_000518.4	HBB	c.93-2A>C
NM_000518.4	HBB	c.93-2A>G
NM_000518.4	HBB	c.93-3T>G
NM_000518.4	HBB	c.93-21G>A
NM_000518.4	HBB	c.92+6T>C
NM_000518.4	HBB	c.92+5G>A
NM_000518.4	HBB	c.92+5G>C
NM_000518.4	HBB	c.92+5G>T
NM_000518.4	HBB	c.92+2T>A
NM_000518.4	HBB	c.92+2T>C
NM_000518.4	HBB	c.92+2T>G
NM_000518.4	HBB	c.92+1G>A
NM_000518.4	HBB	c.92+1G>T
NM_000518.4	HBB	c.92G>C
NM_000518.4	HBB	c.85_86insC
NM_000518.4	HBB	c.82G>T
NM_000518.4	HBB	c.79G>A
NM_000518.4	HBB	c.79G>T
NM_000518.4	HBB	c.78dupT
NM_000518.4	HBB	c.75T>A
NM_000518.4	HBB	c.68_74delAAGTTGG
NM_000518.4	HBB	c.74delGinsCAC
NM_000518.4	HBB	c.67G>T
NM_000518.4	HBB	c.54_59delGGTGAA
NM_000518.4	HBB	c.59A>G
NM_000518.4	HBB	c.52A>T
NM_000518.4	HBB	c.48G>A
NM_000518.4	HBB	c.47G>A
NM_000518.4	HBB	c.45dupG
NM_000518.4	HBB	c.36delT
NM_000518.4	HBB	c.28_29insTA
NM_000518.4	HBB	c.27dupG
NM_000518.4	HBB	c.25_26delAA
NM_000518.4	HBB	c.20delA
NM_000518.4	HBB	c.19G>A
NM_000518.4	HBB	c.19G>T
NM_000518.4	HBB	c.17_18delCT
NM_000518.4	HBB	c.4delG
NM_000518.4	HBB	c.3G>A
NM_000518.4	HBB	c.3G>C
NM_000518.4	HBB	c.3G>T
NM_000518.4	HBB	c.2T>A
NM_000518.4	HBB	c.2T>C
NM_000518.4	HBB	c.2T>G
NM_000518.4	HBB	c.1A>G
NM_000518.4	HBB	c.-29G>A
NM_000518.4	HBB	c.-43C>T
NM_000518.4	HBB	c.-50A>C
NM_000518.4	HBB	c.-50-u28A>G
NM_000518.4	HBB	c.-50-u30T>A
NM_000518.4	HBB	c.-50-u31A>G
NM_000518.4	HBB	c.-50-u87C>G
NM_000518.4	HBB	c.-50-u87C>T
NM_000543.4	SMPD1	c.114delG
NM_000543.4	SMPD1	c.354delC
NM_000543.4	SMPD1	c.475T>C
NM_000543.4	SMPD1	c.538_539delTT
NM_000543.4	SMPD1	c.557C>T
NM_000543.4	SMPD1	c.573delT
NM_000543.4	SMPD1	c.739G>A
NM_000543.4	SMPD1	c.757G>C
NM_000543.4	SMPD1	c.911T>C
NM_000543.4	SMPD1	c.996delC
NM_000543.4	SMPD1	c.1092-1G>C
NM_000543.4	SMPD1	c.1267C>T
NM_000543.4	SMPD1	c.1327C>T
NM_000543.4	SMPD1	c.1341-1G>A
NM_000543.4	SMPD1	c.1426C>T
NM_000543.4	SMPD1	c.1493G>T
NM_000543.4	SMPD1	c.1624C>T
NM_000543.4	SMPD1	c.1785_1786delTT
NM_000543.4	SMPD1	c.1829_1831delGCC
NM_024426.4	WT1	c.1447+5G>A
NM_024426.4	WT1	c.1432+4C>T
NM_024426.4	WT1	c.1391A>G
NM_024426.4	WT1	c.1390G>A
NM_024426.4	WT1	c.1385G>A
NM_024426.4	WT1	c.1385G>C
NM_024426.4	WT1	c.1384C>T
NM_024426.4	WT1	c.1378T>C
NM_024426.4	WT1	c.1372C>T
NM_024426.4	WT1	c.1351T>C
NM_024426.4	WT1	c.1333C>T
NM_024426.4	WT1	c.1323C>G
NM_024426.4	WT1	c.1301G>A
NM_024426.4	WT1	c.1300C>T
NM_024426.4	WT1	c.1288C>T
NM_024426.4	WT1	c.1282T>G
NM_024426.4	WT1	c.1193G>A
NM_024426.4	WT1	c.1149del
NM_024426.4	WT1	c.1021A>G
NM_024426.4	WT1	c.787+15T>A
NM_024426.4	WT1	c.667dup
NM_024426.4	WT1	c.653del
NM_024426.4	WT1	c.576delG
NM_024426.4	WT1	c.528_541delCTACGGGCCCTTCG
NM_024426.4	WT1	c.531C>A
NM_024426.4	WT1	c.478C>T
NM_024426.4	WT1	c.472G>T
NM_024426.4	WT1	c.443delG
NM_024426.4	WT1	c.319delG
NM_024426.4	WT1	c.242_258del17
NM_024426.4	WT1	c.229_231delTAC
NM_024426.4	WT1	c.161delC
NM_000448.2	RAG1	c.256_257delAA
NM_000448.2	RAG1	c.322C>T
NM_000448.2	RAG1	c.775delA
NM_000448.2	RAG1	c.940C>T
NM_000448.2	RAG1	c.983G>A
NM_000448.2	RAG1	c.1566G>T
NM_000448.2	RAG1	c.1681C>T
NM_000448.2	RAG1	c.1682G>A
NM_000448.2	RAG1	c.2164G>A
NM_000448.2	RAG1	c.2320G>T
NM_000448.2	RAG1	c.2326C>T
NM_000448.2	RAG1	c.2333G>A
NM_000448.2	RAG1	c.2814T>G
NM_000448.2	RAG1	c.2923C>T
NM_000448.2	RAG1	c.2974A>G
NM_000536.3	RAG2	c.1352G>C
NM_000536.3	RAG2	c.686G>A
NM_000536.3	RAG2	c.230C>A
NM_000536.3	RAG2	c.115A>G
NM_014384.2	ACAD8	c.286G>A
NM_014384.2	ACAD8	c.409G>A
NM_014384.2	ACAD8	c.413delA
NM_014384.2	ACAD8	c.473A>G
NM_014384.2	ACAD8	c.1000C>T
NM_014384.2	ACAD8	c.1176G>T
NM_001876.3	CPT1A	c.2126G>A
NM_001876.3	CPT1A	c.1493A>G
NM_001876.3	CPT1A	c.1361A>G
NM_001876.3	CPT1A	c.1241C>T
NM_001876.3	CPT1A	c.1079A>G
NM_001876.3	CPT1A	c.298C>T
NM_000019.3	ACAT1	c.2T>A
NM_000019.3	ACAT1	c.278A>G
NM_000019.3	ACAT1	c.433C>G
NM_000019.3	ACAT1	c.547G>A
NM_000019.3	ACAT1	c.814C>T
NM_000019.3	ACAT1	c.935T>C
NM_000019.3	ACAT1	c.997G>C
NM_000019.3	ACAT1	c.1035_1037delAGA
NM_000019.3	ACAT1	c.1083dupA
NM_000019.3	ACAT1	c.1136G>T
NM_000019.3	ACAT1	c.1138G>A
NM_000317.2	PTS	c.37C>T
NM_000317.2	PTS	c.82dupA
NM_000317.2	PTS	c.155A>G
NM_000317.2	PTS	c.164-7T>A
NM_000317.2	PTS	c.169_171delGTG
NM_000317.2	PTS	c.186+1G>A
NM_000317.2	PTS	c.200C>T
NM_000317.2	PTS	c.226C>T
NM_000317.2	PTS	c.244-1G>A
NM_000317.2	PTS	c.272A>G
NM_000317.2	PTS	c.286G>A
NM_000317.2	PTS	c.286G>A
NM_000317.2	PTS	c.317C>T
NM_000317.2	PTS	c.338A>G
NM_000317.2	PTS	c.345G>A
NM_000317.2	PTS	c.347A>G
NM_000317.2	PTS	c.379C>T
NM_000317.2	PTS	c.393delA
NM_000317.2	PTS	c.407A>T
NM_001467.5	SLC37A4	c.1042_1043delCT
NM_001467.5	SLC37A4	c.1015G>T
NM_001467.5	SLC37A4	c.572C>T
NM_001467.5	SLC37A4	c.446G>A
NM_001467.5	SLC37A4	c.352T>C
NM_001017535.1	VDR	c.1190A>C
NM_001017535.1	VDR	c.1171C>A
NM_001017535.1	VDR	c.1171C>T
NM_001017535.1	VDR	c.1036G>A
NM_001017535.1	VDR	c.985G>A
NM_001017535.1	VDR	c.941T>G
NM_001017535.1	VDR	c.915C>G
NM_001017535.1	VDR	c.885C>A
NM_001017535.1	VDR	c.821G>T
NM_001017535.1	VDR	c.454C>T
NM_001017535.1	VDR	c.239G>A
NM_001017535.1	VDR	c.149G>A
NM_001017535.1	VDR	c.137G>A
NM_001017535.1	VDR	c.98G>A
NM_001017535.1	VDR	c.88C>T
NM_000785.3	CYP27B1	c.1375C>T
NM_000785.3	CYP27B1	c.1319_1325dup
NM_000785.3	CYP27B1	c.1319_1325dupCCCACCC
NM_000785.3	CYP27B1	c.1286G>C
NM_000785.3	CYP27B1	c.1226C>T
NM_000785.3	CYP27B1	c.1166G>A
NM_000785.3	CYP27B1	c.1165C>G
NM_000785.3	CYP27B1	c.1144C>T
NM_000785.3	CYP27B1	c.1027C>T
NM_000785.3	CYP27B1	c.1004G>C
NM_000785.3	CYP27B1	c.962C>G
NM_000785.3	CYP27B1	c.692delC
NM_000785.3	CYP27B1	c.630delG
NM_000785.3	CYP27B1	c.589+1G>A
NM_000785.3	CYP27B1	c.566A>G
NM_000785.3	CYP27B1	c.374G>A
NM_000785.3	CYP27B1	c.320G>A
NM_000785.3	CYP27B1	c.305G>A
NM_000785.3	CYP27B1	c.262delG
NM_000277.1	PAH	c.1340C>A
NM_000277.1	PAH	c.1315+6T>A
NM_000277.1	PAH	c.1315+4A>G
NM_000277.1	PAH	c.1315+2T>C
NM_000277.1	PAH	c.1315+1G>A
NM_000277.1	PAH	c.1301C>A
NM_000277.1	PAH	c.1289T>C
NM_000277.1	PAH	c.1238G>C
NM_000277.1	PAH	c.1232C>G
NM_000277.1	PAH	c.1229T>C
NM_000277.1	PAH	c.1222C>T
NM_000277.1	PAH	c.1220C>T
NM_000277.1	PAH	c.1220delC
NM_000277.1	PAH	c.1219C>T
NM_000277.1	PAH	c.1200delG
NM_000277.1	PAH	c.1200-1G>A
NM_000277.1	PAH	c.1200-2A>G
NM_000277.1	PAH	c.1200-8G>A
NM_000277.1	PAH	c.1199+2T>C
NM_000277.1	PAH	c.1199+1G>A
NM_000277.1	PAH	c.1196_1199delTAAG
NM_000277.1	PAH	c.1199G>A
NM_000277.1	PAH	c.1197A>T
NM_000277.1	PAH	c.1183G>C
NM_000277.1	PAH	c.1180G>C
NM_000277.1	PAH	c.1172G>T
NM_000277.1	PAH	c.1161C>A
NM_000277.1	PAH	c.1159T>C
NM_000277.1	PAH	c.1157A>G
NM_000277.1	PAH	c.1144T>C
NM_000277.1	PAH	c.1129delT
NM_000277.1	PAH	c.1127delA
NM_000277.1	PAH	c.1114A>T
NM_000277.1	PAH	c.1112A>G
NM_000277.1	PAH	c.1089delG
NM_000277.1	PAH	c.1084C>A
NM_000277.1	PAH	c.1076C>G
NM_000277.1	PAH	c.1068C>A
NM_000277.1	PAH	c.1066-1G>A
NM_000277.1	PAH	c.1066-11G>A
NM_000277.1	PAH	c.1065+1G>A
NM_000277.1	PAH	c.1057delG
NM_000277.1	PAH	c.1056delT
NM_000277.1	PAH	c.1055delG
NM_000277.1	PAH	c.1045T>C
NM_000277.1	PAH	c.1042C>G
NM_000277.1	PAH	c.1033G>A
NM_000277.1	PAH	c.1024delG
NM_000277.1	PAH	c.1024G>A
NM_000277.1	PAH	c.1021A>T
NM_000277.1	PAH	c.1012G>T
NM_000277.1	PAH	c.1006C>T
NM_000277.1	PAH	c.997C>T
NM_000277.1	PAH	c.977G>A
NM_000277.1	PAH	c.975C>G
NM_000277.1	PAH	c.974A>G
NM_000277.1	PAH	c.970-2A>C
NM_000277.1	PAH	c.969+1G>A
NM_000277.1	PAH	c.964G>A
NM_000277.1	PAH	c.960G>C
NM_000277.1	PAH	c.953T>C
NM_000277.1	PAH	c.943G>T
NM_000277.1	PAH	c.941C>A
NM_000277.1	PAH	c.941delC
NM_000277.1	PAH	c.932T>C
NM_000277.1	PAH	c.926C>A
NM_000277.1	PAH	c.916delA
NM_000277.1	PAH	c.913-7A>G
NM_000277.1	PAH	c.912+2T>C
NM_000277.1	PAH	c.912+1G>A
NM_000277.1	PAH	c.911A>G
NM_000277.1	PAH	c.907T>C
NM_000277.1	PAH	c.901C>T
NM_000277.1	PAH	c.896T>G
NM_000277.1	PAH	c.890G>A
NM_000277.1	PAH	c.889C>T
NM_000277.1	PAH	c.884C>G
NM_000277.1	PAH	c.856G>A
NM_000277.1	PAH	c.847A>T
NM_000277.1	PAH	c.842+5G>A
NM_000277.1	PAH	c.842+3G>C
NM_000277.1	PAH	c.842+2T>A
NM_000277.1	PAH	c.842+1G>A
NM_000277.1	PAH	c.842C>T
NM_000277.1	PAH	c.841C>G
NM_000277.1	PAH	c.839A>G
NM_000277.1	PAH	c.838G>A
NM_000277.1	PAH	c.829T>G
NM_000277.1	PAH	c.826A>G
NM_000277.1	PAH	c.818C>T
NM_000277.1	PAH	c.814G>T
NM_000277.1	PAH	c.810A>T
NM_000277.1	PAH	c.809G>A
NM_000277.1	PAH	c.806delT
NM_000277.1	PAH	c.805A>C
NM_000277.1	PAH	c.789C>G
NM_000277.1	PAH	c.782G>A
NM_000277.1	PAH	c.781C>T
NM_000277.1	PAH	c.776C>T
NM_000277.1	PAH	c.775G>A
NM_000277.1	PAH	c.764T>C
NM_000277.1	PAH	c.763T>G
NM_000277.1	PAH	c.755G>A
NM_000277.1	PAH	c.754C>T
NM_000277.1	PAH	c.745C>T
NM_000277.1	PAH	c.740G>A
NM_000277.1	PAH	c.739G>A
NM_000277.1	PAH	c.737delC
NM_000277.1	PAH	c.734T>A
NM_000277.1	PAH	c.733G>C
NM_000277.1	PAH	c.731C>T
NM_000277.1	PAH	c.728G>A
NM_000277.1	PAH	c.727C>T
NM_000277.1	PAH	c.724C>T
NM_000277.1	PAH	c.722delG
NM_000277.1	PAH	c.721C>T
NM_000277.1	PAH	c.719T>C
NM_000277.1	PAH	c.715G>A
NM_000277.1	PAH	c.712A>C
NM_000277.1	PAH	c.707-1G>A
NM_000277.1	PAH	c.694C>T
NM_000277.1	PAH	c.692C>T
NM_000277.1	PAH	c.691T>C
NM_000277.1	PAH	c.678G>C
NM_000277.1	PAH	c.673C>A
NM_000277.1	PAH	c.671T>C
NM_000277.1	PAH	c.667A>T
NM_000277.1	PAH	c.664_665delGA
NM_000277.1	PAH	c.665A>G
NM_000277.1	PAH	c.662A>G
NM_000277.1	PAH	c.648C>G
NM_000277.1	PAH	c.638T>C
NM_000277.1	PAH	c.635T>C
NM_000277.1	PAH	c.632delC
NM_000277.1	PAH	c.619A>G
NM_000277.1	PAH	c.618C>A
NM_000277.1	PAH	c.611A>G
NM_000277.1	PAH	c.608G>A
NM_000277.1	PAH	c.601C>T
NM_000277.1	PAH	c.580_581delCT
NM_000277.1	PAH	c.581T>C
NM_000277.1	PAH	c.569T>C
NM_000277.1	PAH	c.558_559delAT
NM_000277.1	PAH	c.559T>C
NM_000277.1	PAH	c.535T>C
NM_000277.1	PAH	c.533A>G
NM_000277.1	PAH	c.529G>A
NM_000277.1	PAH	c.521T>C
NM_000277.1	PAH	c.514C>T
NM_000277.1	PAH	c.509+1G>A
NM_000277.1	PAH	c.508C>G
NM_000277.1	PAH	c.503delA
NM_000277.1	PAH	c.502T>C
NM_000277.1	PAH	c.491T>C
NM_000277.1	PAH	c.490A>G
NM_000277.1	PAH	c.482T>C
NM_000277.1	PAH	c.473G>A
NM_000277.1	PAH	c.472C>T
NM_000277.1	PAH	c.464G>A
NM_000277.1	PAH	c.442G>A
NM_000277.1	PAH	c.442-1G>A
NM_000277.1	PAH	c.442-2A>C
NM_000277.1	PAH	c.441+5G>T
NM_000277.1	PAH	c.441+3G>C
NM_000277.1	PAH	c.441+1G>A
NM_000277.1	PAH	c.439C>T
NM_000277.1	PAH	c.398_401delATCA
NM_000277.1	PAH	c.359G>A
NM_000277.1	PAH	c.355C>T
NM_000277.1	PAH	c.353-1G>C
NM_000277.1	PAH	c.331C>T
NM_000277.1	PAH	c.320A>G
NM_000277.1	PAH	c.311C>A
NM_000277.1	PAH	c.284_286delTCA
NM_000277.1	PAH	c.264dupG
NM_000277.1	PAH	c.259A>C
NM_000277.1	PAH	c.250G>T
NM_000277.1	PAH	c.241A>C
NM_000277.1	PAH	c.226G>T
NM_000277.1	PAH	c.208_210delTCT
NM_000277.1	PAH	c.208T>C
NM_000277.1	PAH	c.204A>T
NM_000277.1	PAH	c.199T>C
NM_000277.1	PAH	c.194T>A
NM_000277.1	PAH	c.194T>C
NM_000277.1	PAH	c.193A>G
NM_000277.1	PAH	c.183C>G
NM_000277.1	PAH	c.169-2A>G
NM_000277.1	PAH	c.169-13T>G
NM_000277.1	PAH	c.168+5G>A
NM_000277.1	PAH	c.168+1G>A
NM_000277.1	PAH	c.165delT
NM_000277.1	PAH	c.165T>G
NM_000277.1	PAH	c.143T>C
NM_000277.1	PAH	c.137delG
NM_000277.1	PAH	c.136G>A
NM_000277.1	PAH	c.122T>C
NM_000277.1	PAH	c.119C>T
NM_000277.1	PAH	c.116_118delTCT
NM_000277.1	PAH	c.117C>G
NM_000277.1	PAH	c.111_112insC
NM_000277.1	PAH	c.58C>T
NM_000277.1	PAH	c.47_48delCT
NM_000277.1	PAH	c.1A>G
NM_052845.3	MMAB	c.700C>T
NM_052845.3	MMAB	c.656_659delATCT
NM_052845.3	MMAB	c.656A>G
NM_052845.3	MMAB	c.585-2A>C
NM_052845.3	MMAB	c.573_577delGGCCG
NM_052845.3	MMAB	c.577G>A
NM_052845.3	MMAB	c.572G>A
NM_052845.3	MMAB	c.567_571dupCCGCC
NM_052845.3	MMAB	c.571C>T
NM_052845.3	MMAB	c.569G>A
NM_052845.3	MMAB	c.569G>A
NM_052845.3	MMAB	c.568C>T
NM_052845.3	MMAB	c.556C>T
NM_052845.3	MMAB	c.556C>T
NM_052845.3	MMAB	c.548A>T
NM_052845.3	MMAB	c.548A>T
NM_052845.3	MMAB	c.454G>T
NM_052845.3	MMAB	c.403G>A
NM_052845.3	MMAB	c.349-1G>C
NM_052845.3	MMAB	c.291-1G>A
NM_052845.3	MMAB	c.197-1G>T
NM_000017.2	ACADS	c.136C>T
NM_000017.2	ACADS	c.164C>T
NM_000017.2	ACADS	c.256G>T
NM_000017.2	ACADS	c.274G>T
NM_000017.2	ACADS	c.314T>A
NM_000017.2	ACADS	c.322G>A
NM_000017.2	ACADS	c.323G>A
NM_000017.2	ACADS	c.409C>T
NM_000017.2	ACADS	c.417G>C
NM_000017.2	ACADS	c.434G>T
NM_000017.2	ACADS	c.505A>C
NM_000017.2	ACADS	c.529T>C
NM_000017.2	ACADS	c.596C>T
NM_000017.2	ACADS	c.796C>T
NM_000017.2	ACADS	c.820G>A
NM_000017.2	ACADS	c.826G>A
NM_000017.2	ACADS	c.830C>T
NM_000017.2	ACADS	c.881C>A
NM_000017.2	ACADS	c.944C>T
NM_000017.2	ACADS	c.988C>T
NM_000017.2	ACADS	c.989G>A
NM_000017.2	ACADS	c.995C>T
NM_000017.2	ACADS	c.1031A>G
NM_000017.2	ACADS	c.1058C>T
NM_000017.2	ACADS	c.1095G>T
NM_000017.2	ACADS	c.1112G>T
NM_000017.2	ACADS	c.1130C>T
NM_000017.2	ACADS	c.1138C>T
NM_000017.2	ACADS	c.1147C>T
NM_000017.2	ACADS	c.1170C>G
NM_000017.2	ACADS	c.1173C>G
NM_000017.2	ACADS	c.1231C>T
NM_002150.2	HPD	c.774T>G
NM_002150.2	HPD	c.657T>G
NM_002150.2	HPD	c.600C>G
NM_002150.2	HPD	c.483C>G
NM_002150.2	HPD	c.362A>G
NM_002150.2	HPD	c.75G>A
NM_002150.2	HPD	c.43C>T
NM_004004.5	GJB2	c.647_650delGATA
NM_004004.5	GJB2	c.641T>C
NM_004004.5	GJB2	c.638T>A
NM_004004.5	GJB2	c.633T>A
NM_004004.5	GJB2	c.617A>G
NM_004004.5	GJB2	c.614T>C
NM_004004.5	GJB2	c.598G>A
NM_004004.5	GJB2	c.572delT
NM_004004.5	GJB2	c.551G>A
NM_004004.5	GJB2	c.550C>T
NM_004004.5	GJB2	c.535G>C
NM_004004.5	GJB2	c.533T>C
NM_004004.5	GJB2	c.523C>A
NM_004004.5	GJB2	c.520T>C
NM_004004.5	GJB2	c.518C>G
NM_004004.5	GJB2	c.516G>A
NM_004004.5	GJB2	c.508_511dupAACG
NM_004004.5	GJB2	c.508_509insT
NM_004004.5	GJB2	c.504_505insCCTT
NM_004004.5	GJB2	c.476A>T
NM_004004.5	GJB2	c.439G>A
NM_004004.5	GJB2	c.428G>A
NM_004004.5	GJB2	c.427C>T
NM_004004.5	GJB2	c.416G>A
NM_004004.5	GJB2	c.408C>A
NM_004004.5	GJB2	c.398G>A
NM_004004.5	GJB2	c.370C>T
NM_004004.5	GJB2	c.363delC
NM_004004.5	GJB2	c.358_360delGAG
NM_004004.5	GJB2	c.340G>T
NM_004004.5	GJB2	c.334_335delAA
NM_004004.5	GJB2	c.299_300delAT
NM_004004.5	GJB2	c.290_291insT
NM_004004.5	GJB2	c.283G>A
NM_004004.5	GJB2	c.279G>A
NM_004004.5	GJB2	c.270dupA
NM_004004.5	GJB2	c.269T>C
NM_004004.5	GJB2	c.268C>G
NM_004004.5	GJB2	c.250G>C
NM_004004.5	GJB2	c.246C>G
NM_004004.5	GJB2	c.235delC
NM_004004.5	GJB2	c.231G>A
NM_004004.5	GJB2	c.230G>A
NM_004004.5	GJB2	c.229T>C
NM_004004.5	GJB2	c.195C>G
NM_004004.5	GJB2	c.176_191delGCTGCAAGAACGTGTG
NM_004004.5	GJB2	c.169C>T
NM_004004.5	GJB2	c.167delT
NM_004004.5	GJB2	c.148G>A
NM_004004.5	GJB2	c.139G>T
NM_004004.5	GJB2	c.134G>A
NM_004004.5	GJB2	c.132G>A
NM_004004.5	GJB2	c.119C>A
NM_004004.5	GJB2	c.101T>C
NM_004004.5	GJB2	c.94C>T
NM_004004.5	GJB2	c.71G>A
NM_004004.5	GJB2	c.59T>C
NM_004004.5	GJB2	c.56G>C
NM_004004.5	GJB2	c.44A>C
NM_004004.5	GJB2	c.35_36insC
NM_004004.5	GJB2	c.35delG
NM_004004.5	GJB2	c.1A>G
NM_004004.5	GJB2	c.-23+1G>A
NM_014252.3	SLC25A15	c.79G>A
NM_014252.3	SLC25A15	c.95C>G
NM_014252.3	SLC25A15	c.110T>G
NM_014252.3	SLC25A15	c.164dupA
NM_014252.3	SLC25A15	c.212T>A
NM_014252.3	SLC25A15	c.265C>T
NM_014252.3	SLC25A15	c.337G>T
NM_014252.3	SLC25A15	c.446delG
NM_014252.3	SLC25A15	c.525dupC
NM_014252.3	SLC25A15	c.535C>T
NM_014252.3	SLC25A15	c.538G>A
NM_014252.3	SLC25A15	c.562_564delTTC
NM_014252.3	SLC25A15	c.569G>A
NM_014252.3	SLC25A15	c.658G>A
NM_014252.3	SLC25A15	c.815C>T
NM_014252.3	SLC25A15	c.823C>T
NM_014252.3	SLC25A15	c.824G>A
NM_018283.4	NUDT15	c.55_56insGAGTCG
NM_018283.4	NUDT15	c.415C>T
NM_000321.2	RB1	c.54_76dup
NM_000321.2	RB1	c.219_220delAG
NM_000321.2	RB1	c.297G>A
NM_000321.2	RB1	c.376delA
NM_000321.2	RB1	c.607+1G>A
NM_000321.2	RB1	c.607+1G>T
NM_000321.2	RB1	c.751C>T
NM_000321.2	RB1	c.763C>T
NM_000321.2	RB1	c.869delA
NM_000321.2	RB1	c.940-1G>A
NM_000321.2	RB1	c.958C>T
NM_000321.2	RB1	c.1072C>T
NM_000321.2	RB1	c.1215+1G>A
NM_000321.2	RB1	c.1328C>A
NM_000321.2	RB1	c.1333C>T
NM_000321.2	RB1	c.1345G>A
NM_000321.2	RB1	c.1363C>T
NM_000321.2	RB1	c.1390-2A>G
NM_000321.2	RB1	c.1399C>T
NM_000321.2	RB1	c.1439_1441delACA
NM_000321.2	RB1	c.1654C>T
NM_000321.2	RB1	c.1666C>T
NM_000321.2	RB1	c.1706delT
NM_000321.2	RB1	c.1735C>T
NM_000321.2	RB1	c.1981C>T
NM_000321.2	RB1	c.2053C>T
NM_000321.2	RB1	c.2325+1G>A
NM_000321.2	RB1	c.2359C>T
NM_000321.2	RB1	c.2489+1G>A
NM_000321.2	RB1	c.2489+1G>C
NM_000321.2	RB1	c.2520+1G>T
NM_000053.3	ATP7B	c.4195delC
NM_000053.3	ATP7B	c.4114C>T
NM_000053.3	ATP7B	c.4112T>C
NM_000053.3	ATP7B	c.4088C>T
NM_000053.3	ATP7B	c.4022-2A>G
NM_000053.3	ATP7B	c.4021G>A
NM_000053.3	ATP7B	c.3955C>T
NM_000053.3	ATP7B	c.3904-2A>G
NM_000053.3	ATP7B	c.3903+1delG
NM_000053.3	ATP7B	c.3895C>T
NM_000053.3	ATP7B	c.3886G>A
NM_000053.3	ATP7B	c.3877G>A
NM_000053.3	ATP7B	c.3840_3841insTAG
NM_000053.3	ATP7B	c.3829C>T
NM_000053.3	ATP7B	c.3818C>A
NM_000053.3	ATP7B	c.3809A>G
NM_000053.3	ATP7B	c.3800A>C
NM_000053.3	ATP7B	c.3796G>A
NM_000053.3	ATP7B	c.3784G>T
NM_000053.3	ATP7B	c.3731delT
NM_000053.3	ATP7B	c.3722C>T
NM_000053.3	ATP7B	c.3713_3714delAA
NM_000053.3	ATP7B	c.3700-2A>T
NM_000053.3	ATP7B	c.3699+1G>C
NM_000053.3	ATP7B	c.3694A>C
NM_000053.3	ATP7B	c.3665A>T
NM_000053.3	ATP7B	c.3659C>T
NM_000053.3	ATP7B	c.3646G>A
NM_000053.3	ATP7B	c.3643G>T
NM_000053.3	ATP7B	c.3598C>T
NM_000053.3	ATP7B	c.3556G>A
NM_000053.3	ATP7B	c.3548C>G
NM_000053.3	ATP7B	c.3532A>G
NM_000053.3	ATP7B	c.3517G>A
NM_000053.3	ATP7B	c.3506T>C
NM_000053.3	ATP7B	c.3505A>G
NM_000053.3	ATP7B	c.3451C>T
NM_000053.3	ATP7B	c.3449delA
NM_000053.3	ATP7B	c.3443T>C
NM_000053.3	ATP7B	c.3436G>A
NM_000053.3	ATP7B	c.3426G>C
NM_000053.3	ATP7B	c.3412+1G>A
NM_000053.3	ATP7B	c.3402delC
NM_000053.3	ATP7B	c.3359T>A
NM_000053.3	ATP7B	c.3317T>A
NM_000053.3	ATP7B	c.3305T>C
NM_000053.3	ATP7B	c.3301G>A
NM_000053.3	ATP7B	c.3295G>A
NM_000053.3	ATP7B	c.3263T>A
NM_000053.3	ATP7B	c.3244G>T
NM_000053.3	ATP7B	c.3207C>A
NM_000053.3	ATP7B	c.3191A>C
NM_000053.3	ATP7B	c.3190G>A
NM_000053.3	ATP7B	c.3182G>A
NM_000053.3	ATP7B	c.3147delC
NM_000053.3	ATP7B	c.3140delA
NM_000053.3	ATP7B	c.3128T>C
NM_000053.3	ATP7B	c.3122G>C
NM_000053.3	ATP7B	c.3111delC
NM_000053.3	ATP7B	c.3104G>T
NM_000053.3	ATP7B	c.3097A>G
NM_000053.3	ATP7B	c.3091A>G
NM_000053.3	ATP7B	c.3086C>T
NM_000053.3	ATP7B	c.3084_3085delGA
NM_000053.3	ATP7B	c.3061-12T>A
NM_000053.3	ATP7B	c.3060+5G>T
NM_000053.3	ATP7B	c.3053C>T
NM_000053.3	ATP7B	c.3029A>C
NM_000053.3	ATP7B	c.3008C>T
NM_000053.3	ATP7B	c.3007G>A
NM_000053.3	ATP7B	c.2998G>A
NM_000053.3	ATP7B	c.2975C>A
NM_000053.3	ATP7B	c.2975C>T
NM_000053.3	ATP7B	c.2930C>T
NM_000053.3	ATP7B	c.2924C>A
NM_000053.3	ATP7B	c.2899A>T
NM_000053.3	ATP7B	c.2887C>T
NM_000053.3	ATP7B	c.2871delC
NM_000053.3	ATP7B	c.2866-6T>G
NM_000053.3	ATP7B	c.2865+1G>A
NM_000053.3	ATP7B	c.2862_2865delTCCT
NM_000053.3	ATP7B	c.2828G>A
NM_000053.3	ATP7B	c.2827G>A
NM_000053.3	ATP7B	c.2810delT
NM_000053.3	ATP7B	c.2807T>A
NM_000053.3	ATP7B	c.2804C>T
NM_000053.3	ATP7B	c.2795C>A
NM_000053.3	ATP7B	c.2762G>A
NM_000053.3	ATP7B	c.2755C>G
NM_000053.3	ATP7B	c.2731-2A>G
NM_000053.3	ATP7B	c.2695A>T
NM_000053.3	ATP7B	c.2662A>C
NM_000053.3	ATP7B	c.2659delG
NM_000053.3	ATP7B	c.2623G>A
NM_000053.3	ATP7B	c.2621C>T
NM_000053.3	ATP7B	c.2605G>A
NM_000053.3	ATP7B	c.2604delC
NM_000053.3	ATP7B	c.2575+2T>C
NM_000053.3	ATP7B	c.2572A>G
NM_000053.3	ATP7B	c.2570T>C
NM_000053.3	ATP7B	c.2532delA
NM_000053.3	ATP7B	c.2519C>T
NM_000053.3	ATP7B	c.2513delA
NM_000053.3	ATP7B	c.2463delC
NM_000053.3	ATP7B	c.2447+2T>A
NM_000053.3	ATP7B	c.2438_2440delTAAinsAT
NM_000053.3	ATP7B	c.2407G>A
NM_000053.3	ATP7B	c.2383C>T
NM_000053.3	ATP7B	c.2356-2A>G
NM_000053.3	ATP7B	c.2337G>A
NM_000053.3	ATP7B	c.2336G>A
NM_000053.3	ATP7B	c.2335T>G
NM_000053.3	ATP7B	c.2333G>A
NM_000053.3	ATP7B	c.2333G>T
NM_000053.3	ATP7B	c.2332C>G
NM_000053.3	ATP7B	c.2304_2305insG
NM_000053.3	ATP7B	c.2305A>G
NM_000053.3	ATP7B	c.2304delC
NM_000053.3	ATP7B	c.2297C>G
NM_000053.3	ATP7B	c.2294A>G
NM_000053.3	ATP7B	c.2293G>A
NM_000053.3	ATP7B	c.2279C>T
NM_000053.3	ATP7B	c.2230T>C
NM_000053.3	ATP7B	c.2223T>A
NM_000053.3	ATP7B	c.2132G>A
NM_000053.3	ATP7B	c.2131G>A
NM_000053.3	ATP7B	c.2129G>C
NM_000053.3	ATP7B	c.2128G>A
NM_000053.3	ATP7B	c.2123T>C
NM_000053.3	ATP7B	c.2122-8T>G
NM_000053.3	ATP7B	c.2121+3A>G
NM_000053.3	ATP7B	c.2108G>A
NM_000053.3	ATP7B	c.2071G>A
NM_000053.3	ATP7B	c.2009_2015delATATGCT
NM_000053.3	ATP7B	c.1995G>A
NM_000053.3	ATP7B	c.1968C>A
NM_000053.3	ATP7B	c.1958C>A
NM_000053.3	ATP7B	c.1947-2A>G
NM_000053.3	ATP7B	c.1934T>G
NM_000053.3	ATP7B	c.1924G>C
NM_000053.3	ATP7B	c.1847G>A
NM_000053.3	ATP7B	c.1846C>T
NM_000053.3	ATP7B	c.1782delT
NM_000053.3	ATP7B	c.1772G>A
NM_000053.3	ATP7B	c.1745_1746delTA
NM_000053.3	ATP7B	c.1708-1G>C
NM_000053.3	ATP7B	c.1708-5T>G
NM_000053.3	ATP7B	c.1646T>C
NM_000053.3	ATP7B	c.1639delC
NM_000053.3	ATP7B	c.1630C>T
NM_000053.3	ATP7B	c.1568T>A
NM_000053.3	ATP7B	c.1531C>T
NM_000053.3	ATP7B	c.1475T>C
NM_000053.3	ATP7B	c.1470C>A
NM_000053.3	ATP7B	c.1436delC
NM_000053.3	ATP7B	c.1369C>T
NM_000053.3	ATP7B	c.1340_1343delAAAC
NM_000053.3	ATP7B	c.1186G>T
NM_000053.3	ATP7B	c.892delC
NM_000053.3	ATP7B	c.865C>T
NM_000053.3	ATP7B	c.845delT
NM_000053.3	ATP7B	c.813C>A
NM_000053.3	ATP7B	c.802_808delTGTAAGT
NM_000053.3	ATP7B	c.654_655delCC
NM_000053.3	ATP7B	c.561T>A
NM_000053.3	ATP7B	c.453delC
NM_000053.3	ATP7B	c.448_452delGAGGG
NM_000053.3	ATP7B	c.397delT
NM_000053.3	ATP7B	c.343C>T
NM_000053.3	ATP7B	c.331C>T
NM_000053.3	ATP7B	c.328C>T
NM_000053.3	ATP7B	c.314C>A
NM_000053.3	ATP7B	c.254G>T
NM_000053.3	ATP7B	c.213_214delAT
NM_000053.3	ATP7B	c.122A>G
NM_000282.3	PCCA	c.412G>A
NM_000282.3	PCCA	c.600+1G>T
NM_000282.3	PCCA	c.862A>T
NM_000282.3	PCCA	c.1284+1G>A
NM_000282.3	PCCA	c.1891G>C
NM_002863.3	PYGL	c.1768+1G>A
NM_002863.3	PYGL	c.1620+1G>A
NM_002863.3	PYGL	c.1471C>T
NM_002863.3	PYGL	c.1366G>A
NM_002863.3	PYGL	c.1195C>T
NM_002863.3	PYGL	c.1131C>G
NM_002863.3	PYGL	c.1016A>G
NM_002863.3	PYGL	c.698G>A
NM_002863.3	PYGL	c.529-1G>C
NM_002863.3	PYGL	c.280C>T
NM_002863.3	PYGL	c.38A>C
NM_000161.2	GCH1	c.752G>C
NM_000161.2	GCH1	c.662T>C
NM_000161.2	GCH1	c.633G>A
NM_000161.2	GCH1	c.631_632delAT
NM_000161.2	GCH1	c.626+1G>A
NM_000161.2	GCH1	c.626+1G>T
NM_000161.2	GCH1	c.602G>A
NM_000161.2	GCH1	c.595C>G
NM_000161.2	GCH1	c.586G>T
NM_000161.2	GCH1	c.551G>A
NM_000161.2	GCH1	c.541+1G>C
NM_000161.2	GCH1	c.541+1G>T
NM_000161.2	GCH1	c.510-1G>A
NM_000161.2	GCH1	c.510-1G>C
NM_000161.2	GCH1	c.431A>C
NM_000161.2	GCH1	c.404T>A
NM_000161.2	GCH1	c.401A>T
NM_000161.2	GCH1	c.344-1G>A
NM_000161.2	GCH1	c.344-1G>C
NM_000161.2	GCH1	c.278dup
NM_000161.2	GCH1	c.262C>T
NM_000161.2	GCH1	c.220_223delGCCT
NM_000161.2	GCH1	c.186_197delGGATAACGAGCTinsA
NM_000161.2	GCH1	c.159G>A
NM_000161.2	GCH1	c.142C>T
NM_000161.2	GCH1	c.126_127insC
NM_000161.2	GCH1	c.3G>C
NM_000161.2	GCH1	c.1A>T
NM_005050.3	ABCD4	c.1746_1747insCT
NM_005050.3	ABCD4	c.1667_1668delAG
NM_005050.3	ABCD4	c.1588C>T
NM_005050.3	ABCD4	c.1154delC
NM_005050.3	ABCD4	c.956A>G
NM_005050.3	ABCD4	c.542+1G>A
NM_005050.3	ABCD4	c.427G>A
NM_005050.3	ABCD4	c.410G>A
NM_005050.3	ABCD4	c.319G>A
NM_006432.3	NPC2	c.441+1G>A
NM_006432.3	NPC2	c.441+1G>A
NM_006432.3	NPC2	c.436C>T
NM_006432.3	NPC2	c.436C>T
NM_006432.3	NPC2	c.408_409delAA
NM_006432.3	NPC2	c.358C>T
NM_006432.3	NPC2	c.358C>T
NM_006432.3	NPC2	c.352G>T
NM_006432.3	NPC2	c.352G>T
NM_006432.3	NPC2	c.332delA
NM_006432.3	NPC2	c.295T>C
NM_006432.3	NPC2	c.278G>T
NM_006432.3	NPC2	c.199T>C
NM_006432.3	NPC2	c.199T>C
NM_006432.3	NPC2	c.190+5G>A
NM_006432.3	NPC2	c.190+5G>A
NM_006432.3	NPC2	c.141C>A
NM_006432.3	NPC2	c.140G>T
NM_006432.3	NPC2	c.133C>T
NM_006432.3	NPC2	c.115G>A
NM_006432.3	NPC2	c.115G>A
NM_006432.3	NPC2	c.111delG
NM_006432.3	NPC2	c.111delG
NM_006432.3	NPC2	c.82+2T>C
NM_006432.3	NPC2	c.82+2T>C
NM_006432.3	NPC2	c.58G>T
NM_006432.3	NPC2	c.58G>T
NM_006432.3	NPC2	c.27delG
NM_006432.3	NPC2	c.27delG
NM_006432.3	NPC2	c.1A>T
NM_000369.2	TSHR	c.122G>C
NM_000369.2	TSHR	c.202C>T
NM_000369.2	TSHR	c.326G>A
NM_000369.2	TSHR	c.484C>G
NM_000369.2	TSHR	c.500T>A
NM_000369.2	TSHR	c.928C>T
NM_000369.2	TSHR	c.970C>T
NM_000369.2	TSHR	c.1170T>G
NM_000369.2	TSHR	c.1228G>A
NM_000369.2	TSHR	c.1575C>A
NM_000369.2	TSHR	c.1637G>A
NM_000369.2	TSHR	c.1657G>A
NM_000369.2	TSHR	c.1798T>C
NM_000153.3	GALC	c.1796T>G
NM_000153.3	GALC	c.1630G>A
NM_000153.3	GALC	c.1586C>T
NM_000153.3	GALC	c.1153G>T
NM_000153.3	GALC	c.857G>A
NM_000153.3	GALC	c.628A>T
NM_000153.3	GALC	c.430delA
NM_000153.3	GALC	c.379C>T
NM_000153.3	GALC	c.205C>T
NM_000153.3	GALC	c.169G>A
NM_138576.3	BCL11B	c.2671delG
NM_138576.3	BCL11B	c.2449_2456dup
NM_138576.3	BCL11B	c.2421C>G
NM_138576.3	BCL11B	c.1495G>T
NM_138576.3	BCL11B	c.1323T>G
NM_138576.3	BCL11B	c.242delG
NM_002225.3	IVD	c.134T>C
NM_002225.3	IVD	c.157C>T
NM_002225.3	IVD	c.605G>T
NM_002225.3	IVD	c.941C>T
NM_002225.3	IVD	c.1188delT
NM_014080.4	DUOX2	c.3516-1G>C
NM_014080.4	DUOX2	c.3329G>A
NM_014080.4	DUOX2	c.2907dupG
NM_014080.4	DUOX2	c.2895_2898delGTTC
NM_014080.4	DUOX2	c.2524C>T
NM_014080.4	DUOX2	c.2056C>T
NM_014080.4	DUOX2	c.1588A>T
NM_014080.4	DUOX2	c.1462G>A
NM_014080.4	DUOX2	c.1300C>T
NM_014080.4	DUOX2	c.1126C>T
NM_014080.4	DUOX2	c.1085_1103dup
NM_014080.4	DUOX2	c.602dupG
NM_207581.3	DUOXA2	c.10_11dup
NM_207581.3	DUOXA2	c.413dupA
NM_207581.3	DUOXA2	c.414C>G
NM_207581.3	DUOXA2	c.738C>G
NM_000126.3	ETFA	c.797C>T
NM_000126.3	ETFA	c.495_496delGT
NM_000126.3	ETFA	c.470T>G
NM_000126.3	ETFA	c.346G>A
NM_000126.3	ETFA	c.346G>A
NM_000137.2	FAH	c.1A>G
NM_000137.2	FAH	c.47A>T
NM_000137.2	FAH	c.47A>T
NM_000137.2	FAH	c.192G>T
NM_000137.2	FAH	c.192+1G>T
NM_000137.2	FAH	c.193-1G>T
NM_000137.2	FAH	c.233G>A
NM_000137.2	FAH	c.401C>A
NM_000137.2	FAH	c.520C>T
NM_000137.2	FAH	c.554-1G>C
NM_000137.2	FAH	c.554-1G>T
NM_000137.2	FAH	c.554-1G>T
NM_000137.2	FAH	c.579C>A
NM_000137.2	FAH	c.607-6T>G
NM_000137.2	FAH	c.607-1G>A
NM_000137.2	FAH	c.698A>T
NM_000137.2	FAH	c.698A>T
NM_000137.2	FAH	c.707-1G>A
NM_000137.2	FAH	c.707-1G>C
NM_000137.2	FAH	c.709C>T
NM_000137.2	FAH	c.782C>T
NM_000137.2	FAH	c.782C>T
NM_000137.2	FAH	c.785G>A
NM_000137.2	FAH	c.786G>A
NM_000137.2	FAH	c.786G>A
NM_000137.2	FAH	c.836A>G
NM_000137.2	FAH	c.836A>G
NM_000137.2	FAH	c.838-2A>G
NM_000137.2	FAH	c.914-2A>T
NM_000137.2	FAH	c.939delC
NM_000137.2	FAH	c.982C>T
NM_000137.2	FAH	c.1009G>A
NM_000137.2	FAH	c.1009G>A
NM_000137.2	FAH	c.1027G>T
NM_000137.2	FAH	c.1027G>T
NM_000137.2	FAH	c.1062+5G>A
NM_000137.2	FAH	c.1062+5G>A
NM_000137.2	FAH	c.1069G>T
NM_000137.2	FAH	c.1069G>T
NM_000137.2	FAH	c.1090G>T
NM_000137.2	FAH	c.1090G>T
NM_000137.2	FAH	c.1141A>G
NM_000137.2	FAH	c.1141A>G
NM_000303.2	PMM2	c.26G>A
NM_000303.2	PMM2	c.95T>G
NM_000303.2	PMM2	c.131T>C
NM_000303.2	PMM2	c.193G>T
NM_000303.2	PMM2	c.317A>T
NM_000303.2	PMM2	c.338C>T
NM_000303.2	PMM2	c.349G>C
NM_000303.2	PMM2	c.357C>A
NM_000303.2	PMM2	c.368G>A
NM_000303.2	PMM2	c.385G>A
NM_000303.2	PMM2	c.395T>C
NM_000303.2	PMM2	c.422G>A
NM_000303.2	PMM2	c.484C>T
NM_000303.2	PMM2	c.563A>G
NM_000303.2	PMM2	c.620T>C
NM_000303.2	PMM2	c.647A>T
NM_000303.2	PMM2	c.669C>G
NM_000303.2	PMM2	c.677C>G
NM_000303.2	PMM2	c.691G>A
NM_000303.2	PMM2	c.710C>G
NM_000303.2	PMM2	c.722G>C
NM_025193.3	HSD3B7	c.45_46delAG
NM_025193.3	HSD3B7	c.166+1G>A
NM_025193.3	HSD3B7	c.196delG
NM_025193.3	HSD3B7	c.294dup
NM_025193.3	HSD3B7	c.322+1G>T
NM_025193.3	HSD3B7	c.439G>A
NM_025193.3	HSD3B7	c.890delT
NM_025193.3	HSD3B7	c.1039_1040delCT
NM_000353.2	TAT	c.1249C>T
NM_000353.2	TAT	c.1085G>T
NM_000353.2	TAT	c.668C>G
NM_000353.2	TAT	c.236-5A>G
NM_000353.2	TAT	c.169C>T
NM_012213.2	MLYCD	c.8G>A
NM_012213.2	MLYCD	c.119T>C
NM_012213.2	MLYCD	c.560C>G
NM_012213.2	MLYCD	c.640_641+2del
NM_012213.2	MLYCD	c.947_948del
NM_012213.2	MLYCD	c.949-14A>G
NM_000512.4	GALNS	c.1156C>T
NM_000512.4	GALNS	c.901G>T
NM_000512.4	GALNS	c.860C>T
NM_000512.4	GALNS	c.485C>T
NM_000512.4	GALNS	c.477G>A
NM_000512.4	GALNS	c.337A>T
NM_000018.3	ACADVL	c.65C>A
NM_000018.3	ACADVL	c.266delC
NM_000018.3	ACADVL	c.298_299delCA
NM_000018.3	ACADVL	c.343delG
NM_000018.3	ACADVL	c.388_390delGAG
NM_000018.3	ACADVL	c.428_467del40
NM_000018.3	ACADVL	c.520G>A
NM_000018.3	ACADVL	c.553G>A
NM_000018.3	ACADVL	c.685C>T
[truncated: 913 more rows]
